# Supplementary material for: A systematic review and meta‐analysis of gene therapy in animal models of cerebral glioma: why did promise not translate to human therapy?
Source: PubMed Central journal article supplement (PMC5020579; doi:10.1002/ebm2.6), 2015-01-20
Supplement: EBM2-1-21-s003.pdf [file EBM2-1-21-s003.pdf]

## Supplementary material 2: Study characteristics

| <i>Name</i>   | <i>Year</i> | <i>Animal</i> | <i>Comorbidity</i> | <i>Glioma Model</i> | <i>Gene therapy</i> | <i>Prodrug</i> | <i>Vector</i>         | <i>Route of delivery</i> | <i>Delay to treatment</i> | <i>Survival endpoint</i> |
|---------------|-------------|---------------|--------------------|---------------------|---------------------|----------------|-----------------------|--------------------------|---------------------------|--------------------------|
| Adachi, Y     | 2000        | Rat           | None               | 9L                  | CD                  | 5-FC           | Adenovirus            | Intratumoural            | >0                        | Symptomatic              |
| Adachi, Y     | 2000        | Rat           | None               | 9L                  | CD and UPRT         | 5-FC           | Adenovirus            | Intratumoural            | >0                        | Symptomatic              |
| Aghi, M       | 2006        | Mouse         | Athymic            | U87                 | HSV-gamma34.5/RR    | None           | Adenovirus            | Intratumoural            | >0                        | Symptomatic              |
| ahmed, a      | 2011        | Mouse         | None               | U87                 | S-pk7               | None           | Neural stem cell      | Intratumoural            | >0                        | Symptomatic              |
| ahmed, a      | 2011        | Mouse         | None               | U87                 | S-pk7               | None           | Adenovirus            | Intratumoural            | >0                        | Symptomatic              |
| Ahmed, N      | 2010        | Mouse         | SCID               | Human GBM           | HER2                | None           | Retrovirus            | Intratumoural            | >0                        | Unknown                  |
| Ali, S        | 2005        | Rat           | None               | CNS-1               | HSV-fml-TK          | None           | Adenovirus            | Intratumoural            | >0                        | Symptomatic              |
| Ali, S        | 2005        | Rat           | None               | CNS-1               | HSV-fml-TK          | None           | Adenovirus            | Intratumoural            | >0                        | Symptomatic              |
| Allen, C      | 2008        | Mouse         | None               | GBM12               | MV-GFP              | None           | Retrovirus            | Intratumoural            | >0                        | Symptomatic              |
| Allen, C      | 2008        | Mouse         | None               | GBM12               | MV-GFP/HAA-IL-13    | None           | Retrovirus            | Intratumoural            | >0                        | Symptomatic              |
| Alonso, M     | 2007        | Mouse         | Athymic            | U87                 | E1A                 | None           | Adenovirus            | Intratumoural            | >0                        | Unknown                  |
| Alonso, M     | 2008        | Mouse         | Athymic            | U87                 | RAD001              | None           | Adenovirus            | Intratumoural            | >0                        | Survival                 |
| Altanerova, V | 2011        | Rat           | None               | C6                  | Cdy::UPRT           | 5-FC           | Mesenchymal stem cell | Contralateral            | 0                         | Symptomatic              |

| <i>Name</i>    | <i>Year</i> | <i>Animal</i> | <i>Comorbidity</i> | <i>Glioma Model</i> | <i>Gene therapy</i> | <i>Prodrug</i> | <i>Vector</i>         | <i>Route of delivery</i> | <i>Delay to treatment</i> | <i>Survival endpoint</i> |
|----------------|-------------|---------------|--------------------|---------------------|---------------------|----------------|-----------------------|--------------------------|---------------------------|--------------------------|
| Altanerov a, V | 2011        | Rat           | None               | C6                  | Cdy::UPRT           | 5-FC           | Mesenchymal stem cell | Contralateral            | 0                         | Symptomatic              |
| Altanerov a, V | 2011        | Rat           | None               | C6                  | Cdy::UPRT           | 5-FC           | Mesenchymal stem cell | Contralateral            | 0                         | Symptomatic              |
| Altanerov a, V | 2011        | Rat           | None               | C6                  | Cdy::UPRT           | 5-FC           | Mesenchymal stem cell | Contralateral            | 0                         | Symptomatic              |
| Altanerov a, V | 2011        | Rat           | None               | C6                  | Cdy::UPRT           | 5-FC           | Mesenchymal stem cell | Contralateral            | 0                         | Symptomatic              |
| Altanerov a, V | 2011        | Rat           | None               | C6                  | Cdy::UPRT           | 5-FC           | Mesenchymal stem cell | Contralateral            | 0                         | Symptomatic              |
| Altanerov a, V | 2011        | Rat           | None               | C6                  | Cdy::UPRT           | 5-FC           | Mesenchymal stem cell | Contralateral            | 0                         | Symptomatic              |
| Altanerov a, V | 2011        | Rat           | None               | C6                  | Cdy::UPRT           | 5-FC           | Mesenchymal stem cell | Contralateral            | 0                         | Symptomatic              |
| Amano, T       | 2007        | Mouse         | None               | KR158B              | RHAMM mRNA          | None           | Dendritic cells       | Intraperitoneal          | >0                        | Survival                 |
| Ambar, B       | 1999        | Rat           | None               | F98                 | FasL                | None           | Adenovirus            | Intratumoural            | >0                        | Symptomatic              |
| Andreansky, S  | 1998        | Mouse         | None               | GL261               | IL-10               | None           | Adenovirus            | Intratumoural            | >0                        | Symptomatic              |
| Andreansky, S  | 1998        | Mouse         | None               | GL261               | IL-4                | None           | Adenovirus            | Intratumoural            | >0                        | Symptomatic              |
| Andreansky, S  | 1998        | Mouse         | None               | GL261               | IL-4                | None           | Adenovirus            | Intratumoural            | >0                        | Symptomatic              |
| Andreansky, S  | 1998        | Mouse         | None               | GL261               | IL-4                | None           | Adenovirus            | Intratumoural            | >0                        | Symptomatic              |
| Badie, B       | 1998        | Rat           | None               | 9L                  | p53                 | None           | Adenovirus            | Intratumoural            | >0                        | Survival                 |
| Benedetti, S   | 1997        | Rat           | None               | C6                  | IL-4                | None           | Retrovirus            | Coinoculation            | 0                         | Survival                 |
| Benedetti, S   | 2000        | Rat           | None               | C6                  | IL-4                | None           | Neural stem cell      | Coinoculation            | >0                        | Unknown                  |
| Benedetti, S   | 2000        | Rat           | None               | C6                  | IL-4                | None           | Neural stem cell      | Coinoculation            | 0                         | Unknown                  |
| Benedetti, S   | 2000        | Mouse         | None               | GL261               | GALC                | None           | Neural stem cell      | Coinoculation            | 0                         | Unknown                  |

| <i>Name</i>   | <i>Year</i> | <i>Animal</i> | <i>Comorbidity</i> | <i>Glioma Model</i> | <i>Gene therapy</i> | <i>Prodrug</i> | <i>Vector</i>              | <i>Route of delivery</i> | <i>Delay to treatment</i> | <i>Survival endpoint</i> |
|---------------|-------------|---------------|--------------------|---------------------|---------------------|----------------|----------------------------|--------------------------|---------------------------|--------------------------|
| Benedetti, S  | 2000        | Mouse         | None               | GL261               | GALC                | None           | Neural stem cell           | Coinoculation            | >0                        | Unknown                  |
| Benedetti, S  | 2000        | Mouse         | None               | GL261               | IL-4                | None           | Neural stem cell           | Coinoculation            | >0                        | Unknown                  |
| Benedetti, S  | 2000        | Mouse         | None               | GL261               | IL-4                | None           | Neural stem cell           | Coinoculation            | 0                         | Unknown                  |
| Benedetti, S  | 2003        | Rat           | None               | 9L                  | IL-4                | None           | Retrovirus-producing cells | Coinoculation            | 0                         | Unknown                  |
| Benedetti, S  | 2003        | Rat           | None               | 9L                  | IL-4                | None           | Retrovirus-producing cells | Coinoculation            | 0                         | Unknown                  |
| Benedetti, S  | 2003        | Rat           | None               | 9L                  | IL-4                | None           | Retrovirus-producing cells | Coinoculation            | 0                         | Unknown                  |
| Berenstein, M | 1998        | Rat           | None               | C6                  | HSV-TK              | GCV            | Retrovirus                 | Intratumoural            | <0                        | Unknown                  |
| Berenstein, M | 1998        | Rat           | None               | C6                  | HSV-TK              | GCV            | Retrovirus                 | Coinoculation            | 0                         | Unknown                  |
| Bourbeau, D   | 2007        | Mouse         | None               | GL261               | CU                  | 5-FC           | Adenovirus                 | Intratumoural            | >0                        | Symptomatic              |
| Bourbeau, D   | 2007        | Mouse         | None               | GL261               | CU                  | 5-FC           | Adenovirus                 | Intratumoural            | >0                        | Symptomatic              |
| Bourbeau, D   | 2007        | Mouse         | None               | GL261               | CU                  | 5-FC           | Adenovirus                 | Intratumoural            | >0                        | Symptomatic              |
| Bourbeau, D   | 2007        | Mouse         | None               | GL261               | CU                  | None           | Adenovirus                 | Intratumoural            | >0                        | Symptomatic              |
| Bourbeau, D   | 2007        | Mouse         | Athymic            | U87                 | CU                  | 5-FC           | Adenovirus                 | Intratumoural            | >0                        | Symptomatic              |
| Bourbeau, D   | 2007        | Mouse         | Athymic            | U87                 | CU                  | 5-FC           | Adenovirus                 | Intratumoural            | >0                        | Symptomatic              |
| Bourbeau, D   | 2007        | Mouse         | Athymic            | U87                 | CU                  | 5-FC           | Adenovirus                 | Intratumoural            | >0                        | Symptomatic              |
| Bourbeau, D   | 2007        | Mouse         | Athymic            | U87                 | CU                  | None           | Adenovirus                 | Intratumoural            | >0                        | Symptomatic              |
| Boviatsis, E  | 1994        | Rat           | None               | 9L                  | hrR3 (TK)           | None           | Adenovirus                 | Intratumoural            | >0                        | Unknown                  |

| <i>Name</i>  | <i>Year</i> | <i>Animal</i> | <i>Comorbidity</i> | <i>Glioma Model</i> | <i>Gene therapy</i> | <i>Prodrug</i> | <i>Vector</i> | <i>Route of delivery</i> | <i>Delay to treatment</i> | <i>Survival endpoint</i> |
|--------------|-------------|---------------|--------------------|---------------------|---------------------|----------------|---------------|--------------------------|---------------------------|--------------------------|
| Boviatsis, E | 1994        | Rat           | None               | 9L                  | RR and TK           | None           | Adenovirus    | Intracerebral            | >0                        | Unknown                  |
| Boviatsis, E | 1994        | Rat           | None               | 9L                  | RR and TK           | None           | Adenovirus    | Intracerebral            | >0                        | Unknown                  |
| Bowers, G    | 2003        | Rat           | None               | 9L                  | p53                 | None           | Adenovirus    | Intratumoural            | >0                        | Symptomatic              |
| Bowers, G    | 2003        | Rat           | None               | RG2                 | p53                 | None           | Adenovirus    | Intratumoural            | >0                        | Symptomatic              |
| Broaddus, W  | 1999        | Rat           | None               | RG2                 | p53                 | None           | Adenovirus    | Pretransfected           | 0                         | Unknown                  |
| Candolfi, M  | 2010        | Rat           | None               | CNS-1               | FasL                | None           | Adenovirus    | Intratumoural            | >0                        | Symptomatic              |
| Candolfi, M  | 2010        | Rat           | None               | CNS-1               | FasL                | None           | Adenovirus    | Intratumoural            | >0                        | Symptomatic              |
| Candolfi, M  | 2010        | Rat           | None               | CNS-1               | TNF $\alpha$        | None           | Adenovirus    | Intratumoural            | >0                        | Symptomatic              |
| Candolfi, M  | 2010        | Rat           | None               | CNS-1               | TRAIL               | None           | Adenovirus    | Intratumoural            | >0                        | Symptomatic              |
| Candolfi, M  | 2010        | Mouse         | Athymic            | GBM12               | IL-13               | None           | Adenovirus    | Intratumoural            | >0                        | Symptomatic              |
| Candolfi, M  | 2010        | Mouse         | None               | GL26                | IL-13               | None           | Adenovirus    | Intratumoural            | >0                        | Symptomatic              |
| Candolfi, M  | 2010        | Mouse         | Athymic            | U251                | IL-13               | None           | Adenovirus    | Intratumoural            | >0                        | Symptomatic              |
| Candolfi, M  | 2010        | Mouse         | Athymic            | U251                | IL-13               | None           | Adenovirus    | Intratumoural            | >0                        | Symptomatic              |

| <i>Name</i>   | <i>Year</i> | <i>Animal</i> | <i>Comorbidity</i> | <i>Glioma Model</i> | <i>Gene therapy</i> | <i>Prodrug</i> | <i>Vector</i>         | <i>Route of delivery</i> | <i>Delay to treatment</i> | <i>Survival endpoint</i> |
|---------------|-------------|---------------|--------------------|---------------------|---------------------|----------------|-----------------------|--------------------------|---------------------------|--------------------------|
| Candolfi, M   | 2010        | Mouse         | Athymic            | U251                | IL-13               | None           | Adenovirus            | Intratumoural            | >0                        | Symptomatic              |
| Candolfi, M   | 2010        | Mouse         | Athymic            | U251                | IL-13               | None           | Adenovirus            | Intratumoural            | >0                        | Symptomatic              |
| Chambers, R   | 1995        | Mouse         | SCID               | MT 539              | gamma1 34.5         | None           | Adenovirus            | Intratumoural            | 0                         | Symptomatic + 1 day      |
| Chambers, R   | 1995        | Mouse         | SCID               | MT 539              | gamma1 34.5         | None           | Adenovirus            | Intratumoural            | >0                        | Symptomatic + 1 day      |
| Chambers, R   | 1995        | Mouse         | SCID               | MT 539              | gamma1 34.5         | None           | Adenovirus            | Intratumoural            | 0                         | Symptomatic + 1 day      |
| Chambers, R   | 1995        | Mouse         | SCID               | MT 539              | gamma1 34.5         | None           | Adenovirus            | Intratumoural            | 0                         | Symptomatic + 1 day      |
| Chen, J       | 2006        | Mouse         | Athymic            | C6                  | sFLK-1              | None           | Adenovirus            | Intravenous              | >0                        | Unknown                  |
| Choi, Y       | 2011        | Rat           | None               | F98                 | TRAIL               | None           | Mesenchymal stem cell | Intratumoural            | >0                        | Survival                 |
| Ciesielski, M | 2006        | Mouse         | None               | GL261               | Survivin            | None           | Plasmids              | Subcutaneous             | <0                        | Symptomatic + 1 day      |
| Ciesielski, M | 2006        | Mouse         | None               | GL261               | Survivin            | None           | Plasmids              | Subcutaneous             | <0                        | Symptomatic + 1 day      |
| Ciesielski, M | 2006        | Mouse         | None               | GL261               | Survivin            | None           | Plasmids              | Subcutaneous             | <0                        | Symptomatic + 1 day      |
| Cirielli, C   | 1999        | Mouse         | Athymic            | U251                | p53                 | None           | Adenovirus            | Pretransfected           | 0                         | Survival                 |
| Conrad, C     | 2005        | Mouse         | Athymic            | U87                 | Delta 24-CD         | 5-FC           | Adenovirus            | Intratumoural            | >0                        | Survival                 |
| Conrad, C     | 2005        | Mouse         | Athymic            | U87                 | Delta 24-CD         | 5-FC           | Adenovirus            | Intratumoural            | >0                        | Survival                 |
| Conrad, C     | 2005        | Mouse         | Athymic            | U87                 | Delta 24-CD         | 5-FC           | Adenovirus            | Intratumoural            | >0                        | Survival                 |
| Conrad, C     | 2005        | Mouse         | Athymic            | U87                 | Delta 24-CD         | 5-FC           | Adenovirus            | Intratumoural            | >0                        | Survival                 |
| Cool, V       | 1996        | Rat           | None               | 9L                  | HSV-TK              | GCV            | Adenovirus            | Intratumoural            | 0                         | Unknown                  |

| <i>Name</i>  | <i>Year</i> | <i>Animal</i> | <i>Comorbidity</i> | <i>Glioma Model</i> | <i>Gene therapy</i> | <i>Prodrug</i> | <i>Vector</i> | <i>Route of delivery</i> | <i>Delay to treatment</i> | <i>Survival endpoint</i> |
|--------------|-------------|---------------|--------------------|---------------------|---------------------|----------------|---------------|--------------------------|---------------------------|--------------------------|
| Curtin, J    | 2009        | Mouse         | None               | GL261               | HSV-Flt3L           | None           | Adenovirus    | Intratumoural            | >0                        | Symptomatic              |
| Curtin, J    | 2009        | Mouse         | None               | GL261               | HSV-Flt3L           | None           | Adenovirus    | Intratumoural            | >0                        | Symptomatic              |
| Curtin, J    | 2009        | Mouse         | None               | GL261               | HSV-TK              | None           | Adenovirus    | Intratumoural            | >0                        | Symptomatic              |
| Denbo, J     | 2011        | mouse         | SCID               | MT330               | IFN $\beta$         | None           | Adenovirus    | Intratumoural            | >0                        | Symptomatic              |
| DiMeco, F    | 2000        | Rat           | None               | 9L                  | IL-12               | None           | Retrovirus    | Pretransfected           | >0                        | Survival                 |
| Dmitrieva, N | 2011        | Mouse         | Athymic            | U87                 | Chase               | None           | Adenovirus    | Intracerebral            | >0                        | Symptomatic              |
| Dong, Y      | 1996        | Rat           | None               | 9L                  | CD                  | 5-FC           | Adenovirus    | Intratumoural            | >0                        | Survival                 |
| Dong, Y      | 1996        | Rat           | None               | 9L                  | CD                  | 5-FC           | Adenovirus    | Intratumoural            | >0                        | Survival                 |
| Ehtesham, M  | 2002        | Mouse         | None               | GL261               | IFN $\gamma$        | None           | Adenovirus    | Intratumoural            | >0                        | Unknown                  |
| Ehtesham, M  | 2002        | Mouse         | None               | GL261               | TNF $\alpha$        | None           | Adenovirus    | Intratumoural            | >0                        | Unknown                  |
| Frankel, B   | 2001        | Rat           | None               | 36B10               | FasL                | None           | Plasmids      | Pretransfected           | 0                         | Symptomatic              |
| Friese, M    | 2003        | Mouse         | Athymic            | SMA-560             | MICA                | None           | Adenovirus    | Subcutaneous             | >0                        | Symptomatic              |
| Fueyo, J     | 2003        | Mouse         | Athymic            | U87                 | Rb                  | None           | Adenovirus    | Intratumoural            | >0                        | Symptomatic              |
| Galipeau, J  | 1999        | Rat           | None               | C6                  | HSV-TK              | GCV            | Retrovirus    | Intratumoural            | >0                        | Unknown                  |
| Girald, W    | 2011        | Rat           | None               | U87                 | lin/GO              | None           | Plasmids      | Subcutaneous             | 0                         | Survival                 |
| Girald, W    | 2011        | Rat           | None               | U87                 | lin/GO              | None           | Plasmids      | Intratumoural            | 0                         | Survival                 |
| Glick, R     | 1997        | Mouse         | None               | GL261               | IL-2                | None           | Fibroblast    | Subcutaneous             | 0                         | Unknown                  |
| Glick, R     | 1997        | Mouse         | None               | GL261               | IL-2                | None           | Fibroblast    | Subcutaneous             | 0                         | Unknown                  |
| Glick, R     | 1997        | Mouse         | None               | GL261               | IL-2                | None           | Fibroblast    | Subcutaneous             | 0                         | Unknown                  |
| Glick, R     | 1997        | Mouse         | None               | GL261               | IL-2                | None           | Fibroblast    | Intracerebral            | 0                         | Unknown                  |
| Glick, R     | 1997        | Mouse         | None               | GL261               | IL-2                | None           | Fibroblast    | Intracerebral            | 0                         | Unknown                  |

| <i>Name</i>      | <i>Year</i> | <i>Animal</i> | <i>Comorbidity</i> | <i>Glioma Model</i> | <i>Gene therapy</i> | <i>Prodrug</i> | <i>Vector</i>           | <i>Route of delivery</i>   | <i>Delay to treatment</i> | <i>Survival endpoint</i> |
|------------------|-------------|---------------|--------------------|---------------------|---------------------|----------------|-------------------------|----------------------------|---------------------------|--------------------------|
| Glick, R         | 1999        | Mouse         | None               | GL261               | IL-2                | None           | Fibroblast              | Coinoculation              | 0                         | Survival                 |
| Glick, R         | 1999        | Mouse         | None               | GL261               | IL-2                | None           | Fibroblast              | Coinoculation              | 0                         | Survival                 |
| Glick, R         | 2006        | Mouse         | None               | GL261               | IL-2                | None           | Fibroblast              | Coinoculation              | 0                         | Unknown                  |
| Glick, R         | 2006        | Mouse         | None               | GL261               | IL-2                | None           | Fibroblast              | pretreatment/Coinoculation | <0                        | Unknown                  |
| Glick, R         | 2006        | Mouse         | None               | GL261               | IL-2                | None           | Fibroblast              | Coinoculation              | 0                         | Unknown                  |
| Goldman, C       | 1998        | mouse         | SCID               | D54                 | sFlt-1              | None           | Plasmids                | Pretransfected             | 0                         | Unknown                  |
| Gomez-Manzanc, C | 2004        | Mouse         | Athymic            | D54                 | E1a and E1b         | None           | Adenovirus              | Intratumoural              | >0                        | Symptomatic              |
| Hamed, H         | 2010        | Mouse         | Athymic            | GBM14               | mda/IL-24           | None           | Adenovirus              | Intratumoural              | >0                        | Symptomatic              |
| Harada, K        | 1995        | Rat           | Athymic            | T9                  | IFN $\beta$         | None           | Lipo/polyplexes         | Coinoculation              | 0                         | Survival                 |
| Harding, T       | 2006        | Mouse         | None               | 4C8                 | VEGF                | None           | rAdeno-associated virus | Intratumoural              | >0                        | Symptomatic              |
| Harding, T       | 2006        | Mouse         | None               | 4C8                 | VEGF                | None           | rAdeno-associated virus | Intratumoural              | >0                        | Symptomatic              |
| Harding, T       | 2006        | Mouse         | None               | 4C8                 | VEGF                | None           | rAdeno-associated virus | Intratumoural              | >0                        | Symptomatic              |
| Harding, T       | 2006        | Mouse         | None               | C6                  | VEGF                | None           | rAdeno-associated virus | Intratumoural              | >0                        | Symptomatic              |
| Harding, T       | 2006        | Mouse         | None               | C6                  | VEGF                | None           | rAdeno-associated virus | Intratumoural              | >0                        | Symptomatic              |
| Harding, T       | 2006        | Mouse         | None               | C6                  | VEGF                | None           | rAdeno-associated virus | Intratumoural              | >0                        | Symptomatic              |
| Harding, T       | 2006        | Mouse         | None               | U251                | VEGF                | None           | rAdeno-associated virus | Intratumoural              | >0                        | Symptomatic              |
| Harding, T       | 2006        | Mouse         | None               | U251                | VEGF                | None           | rAdeno-associated virus | Intratumoural              | >0                        | Symptomatic              |

| <i>Name</i>   | <i>Year</i> | <i>Animal</i> | <i>Comorbidity</i> | <i>Glioma Model</i> | <i>Gene therapy</i> | <i>Prodrug</i> | <i>Vector</i>           | <i>Route of delivery</i> | <i>Delay to treatment</i> | <i>Survival endpoint</i> |
|---------------|-------------|---------------|--------------------|---------------------|---------------------|----------------|-------------------------|--------------------------|---------------------------|--------------------------|
| Harding, T    | 2006        | Mouse         | None               | U251                | VEGF                | None           | rAdeno-associated virus | Intratumoural            | >0                        | Symptomatic              |
| Harding, T    | 2006        | Rat           | Athymic            | U251                | VEGF                | None           | rAdeno-associated virus | Intratumoural            | >0                        | Symptomatic              |
| Harding, T    | 2006        | Mouse         | None               | U87                 | VEGF                | None           | rAdeno-associated virus | Intratumoural            | >0                        | Symptomatic              |
| Harding, T    | 2006        | Mouse         | None               | U87                 | VEGF                | None           | rAdeno-associated virus | Intratumoural            | >0                        | Symptomatic              |
| Harding, T    | 2006        | Mouse         | None               | U87                 | VEGF                | None           | rAdeno-associated virus | Intratumoural            | >0                        | Symptomatic              |
| Hasegawa, H   | 2010        | Rat           | None               | 9L                  | IFN $\beta$         | None           | Retrovirus              | Intratumoural            | >0                        | Symptomatic              |
| Hellums, E    | 2005        | Mouse         | None               | 4C8                 | HSV-TK and IL-12    | None           | Adenovirus              | Intratumoural            | >0                        | Symptomatic              |
| Hellums, E    | 2005        | Mouse         | None               | 4C8                 | HSV-TK and IL-12    | None           | Adenovirus              | Intratumoural            | >0                        | Symptomatic              |
| Herrlinger, U | 1997        | Mouse         | None               | GL261               | GM-CSF              | None           | Retrovirus              | Subcutaneous             | <0                        | Symptomatic              |
| Herrlinger, U | 1997        | Mouse         | None               | GL261               | GM-CSF              | None           | Retrovirus              | Subcutaneous             | >0                        | Symptomatic              |
| Herrlinger, U | 1997        | Mouse         | None               | GL261               | GM-CSF              | None           | Retrovirus              | Subcutaneous             | >0                        | Symptomatic              |
| Herrlinger, U | 1997        | Mouse         | None               | GL261               | GM-CSF              | None           | Retrovirus              | Subcutaneous             | <0                        | Symptomatic              |
| Herrlinger, U | 1997        | Mouse         | None               | GL261               | GM-CSF              | None           | Retrovirus              | Subcutaneous             | <0                        | Symptomatic              |
| Herrlinger, U | 1998        | rat           | None               | D74                 | HSV-TK              | None           | Adenovirus              | Intratumoural            | >0                        | Symptomatic              |
| Herrlinger, U | 1998        | rat           | None               | D74                 | HSV-TK              | None           | Adenovirus              | Intratumoural            | >0                        | Symptomatic              |
| Hoffman, G    | 2007        | Mouse         | Athymic            | U251                | RGD                 | None           | Adenovirus              | Intratumoural            | >0                        | Unknown                  |
| Hoffman, G    | 2007        | Mouse         | Athymic            | U251                | RGD                 | None           | Adenovirus              | Intratumoural            | >0                        | Unknown                  |
| Hoffman, G    | 2007        | Mouse         | Athymic            | U251                | RGD                 | None           | Adenovirus              | Intratumoural            | >0                        | Unknown                  |

| <i>Name</i> | <i>Year</i> | <i>Animal</i> | <i>Comorbidity</i> | <i>Glioma Model</i> | <i>Gene therapy</i> | <i>Prodrug</i> | <i>Vector</i>          | <i>Route of delivery</i> | <i>Delay to treatment</i> | <i>Survival endpoint</i> |
|-------------|-------------|---------------|--------------------|---------------------|---------------------|----------------|------------------------|--------------------------|---------------------------|--------------------------|
| Hoffman, G  | 2007        | Mouse         | Athymic            | U251                | RGD                 | None           | Adenovirus             | Intratumoural            | >0                        | Unknown                  |
| Huang, D    | 2010        | Rat           | None               | C6                  | Cx43                | GCV            | Plasmids               | Intratumoural            | >0                        | Survival                 |
| Huang, D    | 2010        | Rat           | None               | C6                  | HSV-TK              | GCV            | BMesenchymal stem cell | Intratumoural            | >0                        | Survival                 |
| Huang, Q    | 2007        | Rat           | None               | C6                  | p53                 | None           | Adenovirus             | Intratumoural            | >0                        | Survival                 |
| Huang, Q    | 2010        | Rat           | None               | C6                  | HSV-TK              | ACV            | Adenovirus             | Intratumoural            | >0                        | Survival                 |
| Huang, Q    | 2010        | Rat           | None               | C6                  | p53                 | ACV            | Adenovirus             | Intratumoural            | >0                        | Survival                 |
| Huang, S    | 2011        | Mouse         | None               | C6                  | TRAIL               | None           | Lipo/polyplexes        | Intravenous              | >0                        | Unknown                  |
| Huang, S    | 2011        | Mouse         | None               | C6                  | TRAIL               | None           | Lipo/polyplexes        | Intravenous              | >0                        | Unknown                  |
| Huang, S    | 2011        | Mouse         | None               | C6                  | TRAIL               | None           | Lipo/polyplexes        | Intravenous              | >0                        | Unknown                  |
| Huang, S    | 2011        | Mouse         | None               | C6                  | TRAIL               | None           | Lipo/polyplexes        | Intravenous              | >0                        | Unknown                  |
| Huszthy, P  | 2006        | Rat           | None               | BT4C                | Human Endostatin    | None           | Retrovirus             | Pretransfected           | 0                         | Survival                 |
| Huszthy, P  | 2006        | Rat           | None               | BT4C                | Murine Endostatin   | None           | Retrovirus             | Pretransfected           | 0                         | Survival                 |
| Huszthy, P  | 2008        | Rat           | Athymic            | GBM1-6              | HSV-gamma34.5       | None           | Adenovirus             | Intratumoural            | >0                        | Symptomatic              |
| Huszthy, P  | 2010        | Rat           | None               | GBM                 | HSV-TK              | GCV            | Retrovirus             | Intratumoural            | >0                        | Unknown                  |
| Huszthy, P  | 2010        | Rat           | None               | GBM                 | HSV-TK              | GCV            | Retrovirus             | Intratumoural            | >0                        | Unknown                  |
| Ikeda, K    | 2000        | Rat           | Athymic            | U87                 | HSV-TK              | CPA and CVF    | Adenovirus             | IArterial                | >0                        | Symptomatic              |
| Ito, S      | 2010        | Mouse         | Athymic            | U251                | CD and IFN $\beta$  | 5-FC           | Neural stem cell       | Intravenous              | >0                        | Unknown                  |

| <i>Name</i> | <i>Year</i> | <i>Animal</i> | <i>Comorbidity</i> | <i>Glioma Model</i> | <i>Gene therapy</i> | <i>Prodrug</i> | <i>Vector</i>    | <i>Route of delivery</i> | <i>Delay to treatment</i> | <i>Survival endpoint</i> |
|-------------|-------------|---------------|--------------------|---------------------|---------------------|----------------|------------------|--------------------------|---------------------------|--------------------------|
| Ito, S      | 2010        | Mouse         | None               | U251                | IFN $\beta$         | 5-FC           | Neural stem cell | Intravenous              | >0                        | Survival                 |
| Iwadate, Y  | 2000        | Rat           | None               | 9L                  | IL-2                | None           | Retrovirus       | Coinoculation            | 0                         | Symptomatic              |
| Iwadate, Y  | 2000        | Rat           | None               | 9L                  | IL-2                | None           | Retrovirus       | Coinoculation            | 0                         | Symptomatic              |
| Iwadate, Y  | 2005        | Rat           | None               | 9L irradiated       | IL-2                | None           | Retrovirus       | Intratumoural            | >0                        | Survival                 |
| Jeong, M    | 2009        | Mouse         | Athymic            | U87                 | stTRAIL             | None           | Adenovirus       | Intratumoural            | >0                        | Survival                 |
| Jia, Q      | 2010        | Rat           | None               | C6                  | Ku70                | None           | Adenovirus       | Pretransfected           | >0                        | Survival                 |
| Kanai, R    | 2006        | Mouse         | None               | U87                 | dvM345              | None           | Plasmids         | Intratumoural            | >0                        | Survival                 |
| Kanai, R    | 2006        | Mouse         | None               | U87                 | G207                | None           | Adenovirus       | Pretransfected           | >0                        | Survival                 |
| Kanai, R    | 2011        | Mouse         | Athymic            | BT74                | G47-delta           | None           | Adenovirus       | Intratumoural            | >0                        | Symptomatic              |
| Kanai, R    | 2011        | Mouse         | Athymic            | GBM8                | G47-delta           | None           | Adenovirus       | Intratumoural            | >0                        | Symptomatic              |
| Kanai, R    | 2012        | Mouse         | Athymic            | MGG4                | HSV-gamma34.5       | None           | Adenovirus       | Intratumoural            | >0                        | Unknown                  |
| Kanai, R    | 2012        | Mouse         | Athymic            | MGG4                | HSV-gamma34.5       | None           | Adenovirus       | Intratumoural            | >0                        | Unknown                  |
| Kanai, R    | 2012        | Mouse         | None               | N18                 | HSV-gamma34.5       | None           | Adenovirus       | Intratumoural            | >0                        | Unknown                  |
| Kanai, R    | 2012        | Mouse         | None               | N18                 | HSV-gamma34.5       | None           | Adenovirus       | Intratumoural            | >0                        | Unknown                  |
| Kanai, R    | 2012        | Mouse         | None               | N18                 | HSV-gamma34.5       | None           | Adenovirus       | Intratumoural            | >0                        | Unknown                  |
| Kanai, R    | 2012        | Mouse         | Athymic            | U87                 | HSV-gamma34.5       | None           | Adenovirus       | Intratumoural            | >0                        | Unknown                  |
| Kanai, R    | 2012        | Mouse         | Athymic            | U87                 | HSV-gamma34.5       | None           | Adenovirus       | Intratumoural            | >0                        | Unknown                  |
| Kanai, R    | 2012        | Mouse         | Athymic            | U87                 | HSV-gamma34.5       | None           | Adenovirus       | Intratumoural            | >0                        | Unknown                  |

| <i>Name</i>  | <i>Year</i> | <i>Animal</i> | <i>Comorbidity</i> | <i>Glioma Model</i> | <i>Gene therapy</i> | <i>Prodrug</i> | <i>Vector</i>          | <i>Route of delivery</i> | <i>Delay to treatment</i> | <i>Survival endpoint</i> |
|--------------|-------------|---------------|--------------------|---------------------|---------------------|----------------|------------------------|--------------------------|---------------------------|--------------------------|
| Kato, T      | 2010        | Mouse         | SCID               | 0316-GIC            | MGMT siRNA          | none           | Lipo/polyplexes        | Coinoculation            | 0                         | Unknown                  |
| Kato, T      | 2010        | Mouse         | SCID               | 0316-GIC            | MGMT siRNA          | TMZ            | Lipo/polyplexes        | Coinoculation            | 0                         | Unknown                  |
| Kikuchi, T   | 1999        | Mouse         | None               | SR-B10.A            | IL-2                | None           | Lipo/polyplexes        | Intraperitoneal          | >0                        | Unknown                  |
| Kim, C       | 2006        | Mouse         | None               | GL261               | IL-12               | None           | Dendritic cells        | Subcutaneous             | <0                        | Survival                 |
| Kim, C       | 2007        | Mouse         | None               | GL261               | TAT-Survivin        | None           | Dendritic cells        | Subcutaneous             | >0                        | Survival                 |
| Kim, C       | 2007        | Mouse         | None               | GL261               | TAT-Survivin        | TMZ            | Dendritic cells        | Subcutaneous             | >0                        | Survival                 |
| Kim, D       | 2008        | Mouse         | Athymic            | U87                 | TRAIL               | None           | Mesenchymal stem cell  | Contralateral            | >0                        | Unknown                  |
| Kim, S       | 2008        | Mouse         | Athymic            | U87                 | TRAIL               | None           | Adenovirus             | Contralateral            | >0                        | Unknown                  |
| Kurozumi, K  | 2007        | Rat           | None               | D74/HveC            | IFN $\alpha$        | None           | Adenovirus             | Intratumoural            | >0                        | Symptomatic              |
| Kuwashima, N | 2005        | Mouse         | None               | GL261               | IFN $\alpha$        | None           | Dendritic cells        | Intratumoural            | >0                        | Symptomatic              |
| Lal, B       | 2005        | Mouse         | SCID               | U87                 | c-met and SF-HGF    | None           | Oligopeptides          | Intratumoural            | >0                        | Survival                 |
| Lamfers, M   | 2005        | Mouse         | None               | U87                 | TIMP-3              | None           | Adenovirus             | Subcutaneous             | 0                         | Survival                 |
| Lau, C       | 2009        | Mouse         | Athymic            | U251                | FOXO1               | None           | Adenovirus             | Intratumoural            | >0                        | Survival                 |
| Lau, C       | 2009        | Mouse         | Athymic            | U87                 | FOXO1               | None           | Adenovirus             | Intratumoural            | >0                        | Survival                 |
| Lee, E       | 2011        | Mouse         | None               | U87                 | HSV-TK              | GCV            | Neural stem cell       | Contralateral            | >0                        | Unknown                  |
| Lee, S       | 2012        | Mouse         | None               | U87                 | HSV-TK              | None           | Adenovirus             | Intracerebral            | >0                        | Unknown                  |
| Lee, S       | 2012        | Mouse         | None               | U87                 | HSV-TK              | None           | Adenovirus             | Intracerebral            | >0                        | Unknown                  |
| Lee, S       | 2012        | Mouse         | None               | U87                 | miR145              | None           | Adenovirus             | Intracerebral            | >0                        | Unknown                  |
| Li, C        | 2007        | Rat           | None               | C6                  | IL-18               | None           | BMesenchymal stem cell | Contralateral            | >0                        | Unknown                  |
| Li, H        | 1999        | Mouse         | Athymic            | U87                 | p53                 | None           | Adenovirus             | Intratumoural            | >0                        | Survival                 |

| <i>Name</i> | <i>Year</i> | <i>Animal</i> | <i>Comorbidity</i> | <i>Glioma Model</i> | <i>Gene therapy</i> | <i>Prodrug</i> | <i>Vector</i>    | <i>Route of delivery</i>  | <i>Delay to treatment</i> | <i>Survival endpoint</i> |
|-------------|-------------|---------------|--------------------|---------------------|---------------------|----------------|------------------|---------------------------|---------------------------|--------------------------|
| Li, H       | 1999        | Mouse         | Athymic            | U87                 | p53                 | None           | Adenovirus       | Intratumoural             | >0                        | Survival                 |
| Li, H       | 1999        | Mouse         | Athymic            | U87                 | p53                 | None           | Adenovirus       | Intratumoural             | >0                        | Survival                 |
| Li, J       | 2011        | Mouse         | None               | U87                 | TRAIL               | None           | Lipo/polyplexes  | Intravenous               | >0                        | Survival                 |
| Li, J       | 2011        | Mouse         | None               | U87                 | TRAIL               | None           | Lipo/polyplexes  | Intravenous               | >0                        | Survival                 |
| Li, S       | 2005        | Mouse         | None               | C6                  | HSV-TK              | GCV            | Neural stem cell | Coinoculation             | 0                         | Survival                 |
| Li, Y       | 2005        | Rat           | None               | C6                  | HSV-TK              | None           | Retrovirus       | Coinoculation             | 0                         | Survival                 |
| Li, Y       | 2005        | Mouse         | None               | C6                  | HSV-TK              | None           | Neural stem cell | Coinoculation             | 0                         | Survival                 |
| Liang, B    | 2009        | Rat           | None               | C6                  | TRAIL               | None           | Plasmids         | Intraperitonealsi lateral | >0                        | Survival                 |
| Liang, C    | 2009        | Rat           | None               | C6                  | CD/TRAIL            | None           | Plasmids         | Intraperitonealsi lateral | >0                        | Survival                 |
| Liau, L     | 1998        | Rat           | None               | C6                  | TGF- $\beta$ 2      | None           | Plasmids         | Subcutaneous              | >0                        | Survival                 |
| Lichter, T  | 1995        | Mouse         | None               | GL261               | IFN $\gamma$        | None           | Fibroblast       | Coinoculation             | 0                         | Survival                 |
| Lichter, T  | 1995        | Mouse         | None               | GL261               | IL-2                | None           | Fibroblast       | Coinoculation             | 0                         | Survival                 |
| Lichter, T  | 2002        | Mouse         | None               | GL261               | IL-2/Kb             | None           | Fibroblast       | Coinoculation             | >0                        | Unknown                  |
| Lichter, T  | 2002        | Mouse         | None               | GL261               | IL-2/Kb             | None           | Fibroblast       | Coinoculation             | <0                        | Unknown                  |
| Lichter, T  | 2003        | Mouse         | None               | GL261               | IFN $\gamma$        | None           | Fibroblast       | Coinoculation             | 0                         | Symptomatic              |
| Lichter, T  | 2003        | Mouse         | None               | GL261               | IL-2                | None           | Fibroblast       | Coinoculation             | 0                         | Symptomatic              |
| Lichter, T  | 2003        | Mouse         | None               | GL261               | IL-2+IFN $\gamma$   | None           | Fibroblast       | Coinoculation             | 0                         | Symptomatic              |
| Lichter, T  | 2003        | Mouse         | None               | GL261               | IL-2K               | None           | Fibroblast       | Coinoculation             | >0                        | Symptomatic              |
| Liu, S      | 2012        | Mouse         | None               | U87                 | TRAIL               | Doxorubicin    | Lipo/polyplexes  | Intravenous               | >0                        | Survival                 |
| Liu, S      | 2012        | Mouse         | None               | U87                 | TRAIL               | None           | Lipo/polyplexes  | Intravenous               | >0                        | Survival                 |

| <i>Name</i>  | <i>Year</i> | <i>Animal</i> | <i>Comorbidity</i> | <i>Glioma Model</i> | <i>Gene therapy</i> | <i>Prodrug</i> | <i>Vector</i>          | <i>Route of delivery</i> | <i>Delay to treatment</i> | <i>Survival endpoint</i> |
|--------------|-------------|---------------|--------------------|---------------------|---------------------|----------------|------------------------|--------------------------|---------------------------|--------------------------|
| Liu, Y       | 2002        | Mouse         | None               | GL261               | IL-12               | None           | Adenovirus             | Intratumoural            | >0                        | Symptomatic              |
| Liu, Y       | 2011        | Mouse         | None               | U251                | TRAIL               | None           | Adenovirus             | Intratumoural            | >0                        | Symptomatic              |
| Lu, W        | 2006        | Mouse         | None               | C6                  | pORF-hTRAIL         | None           | Plasmids               | Intravenous              | >0                        | Symptomatic              |
| Lumniczky, K | 2002        | Mouse         | None               | GL261               | GM-CSF and IL4      | None           | Adenovirus             | Subcutaneous             | 0                         | Symptomatic              |
| Lumniczky, K | 2002        | Mouse         | None               | GL261               | GM-CSF              | None           | Adenovirus             | Subcutaneous             | 0                         | Symptomatic              |
| Lumniczky, K | 2002        | Mouse         | None               | GL261               | GM-CSF              | None           | Adenovirus             | Subcutaneous             | 0                         | Symptomatic              |
| Lumniczky, K | 2002        | Mouse         | None               | GL261               | GM-CSF              | None           | Adenovirus             | Subcutaneous             | 0                         | Symptomatic              |
| Lumniczky, K | 2002        | Mouse         | None               | GL261               | GM-CSF              | None           | Adenovirus             | Subcutaneous             | 0                         | Symptomatic              |
| Lumniczky, K | 2002        | Mouse         | None               | GL261               | GM-CSF              | None           | Adenovirus             | Subcutaneous             | 0                         | Symptomatic              |
| Lumniczky, K | 2002        | Mouse         | None               | GL261               | IL-12               | None           | Adenovirus             | Subcutaneous             | 0                         | Symptomatic              |
| Lumniczky, K | 2002        | Mouse         | None               | GL261               | IL-4                | None           | Adenovirus             | Subcutaneous             | 0                         | Symptomatic              |
| Lumniczky, K | 2002        | Mouse         | None               | GL261               | IL-4                | None           | Adenovirus             | Subcutaneous             | 0                         | Symptomatic              |
| Lumniczky, K | 2002        | Mouse         | None               | GL261               | IL-4                | None           | Adenovirus             | Subcutaneous             | 0                         | Symptomatic              |
| Lumniczky, K | 2002        | Mouse         | None               | GL261               | IL-4                | None           | Adenovirus             | Subcutaneous             | 0                         | Symptomatic              |
| Lumniczky, K | 2002        | Mouse         | None               | GL261               | IL-4                | None           | Adenovirus             | Subcutaneous             | 0                         | Symptomatic              |
| Lun, X       | 2006        | Mouse         | Athymic            | U87                 | M protein           | None           | Adeno-associated virus | Intravenous              | >0                        | Symptomatic              |
| Lun, X       | 2009        | Rat           | None               | F98                 | EGFP                | None           | Adenovirus             | Intravenous              | >0                        | Symptomatic              |
| Lun, X       | 2009        | Rat           | None               | RG2                 | EGFP                | None           | Adenovirus             | Intravenous              | >0                        | Symptomatic              |
| Lun, X       | 2009        | Rat           | None               | RG2                 | EGFP                | None           | Adenovirus             | Intravenous              | >0                        | Symptomatic              |

| <i>Name</i> | <i>Year</i> | <i>Animal</i> | <i>Comorbidity</i> | <i>Glioma Model</i> | <i>Gene therapy</i>         | <i>Prodrug</i> | <i>Vector</i>                  | <i>Route of delivery</i> | <i>Delay to treatment</i> | <i>Survival endpoint</i> |
|-------------|-------------|---------------|--------------------|---------------------|-----------------------------|----------------|--------------------------------|--------------------------|---------------------------|--------------------------|
| Lun, X      | 2009        | Rat           | None               | RG2                 | EGFP                        | None           | Adenovirus                     | Intravenous              | >0                        | Symptomatic              |
| Lun, X      | 2009        | Rat           | None               | RG2                 | EGFP                        | None           | Adenovirus                     | Intravenous              | >0                        | Symptomatic              |
| Ma, H       | 2002        | Rat           | None               | C6                  | Angiostatin                 | None           | Adeno-associated virus         | Intratumoural            | >0                        | Unknown                  |
| Machein, M  | 1999        | Rat           | None               | GS-9L               | VEGFR-2                     | None           | Retrovirus                     | Intratumoural            | 0                         | Symptomatic              |
| Machein, M  | 1999        | Rat           | None               | GS-9L               | VEGFR-2                     | None           | Retrovirus                     | Intratumoural            | 0                         | Symptomatic              |
| Machein, M  | 1999        | Rat           | None               | GS-9L               | VEGFR-2                     | None           | Retrovirus                     | Intratumoural            | 0                         | Symptomatic              |
| Machein, M  | 1999        | Rat           | None               | GS-9L               | VEGFR-2                     | None           | Retrovirus                     | Intratumoural            | 0                         | Symptomatic              |
| Machein, M  | 1999        | Rat           | None               | GS-9L               | VEGFR-2                     | None           | Retrovirus                     | Intratumoural            | 0                         | Symptomatic              |
| Maeda, M    | 2006        | Rat           | None               | C6                  | Cre-loxP<br>CALG Tk<br>GFAP | GCV            | Adenovirus                     | Intratumoural            | >0                        | Survival                 |
| Maeda, M    | 2006        | Rat           | None               | C6                  | Cre-loxP<br>CALN GFAP       | GCV            | Adenovirus                     | Intratumoural            | >0                        | Survival                 |
| Maguire, C  | 2008        | Mouse         | Athymic            | U87                 | IFN $\beta$                 | None           | Adeno-associated virus         | Intratumoural            | <0                        | Symptomatic              |
| Maguire, C  | 2008        | Mouse         | Athymic            | U87                 | IFN $\beta$                 | None           | Adeno-associated virus         | Intratumoural            | <0                        | Symptomatic              |
| Manome, Y   | 1996        | rat           | None               | 9L                  | Cytochrome<br>P450 2B1      | CPA            | Retrovirus-<br>producing cells | Intratumoural            | >0                        | Survival                 |
| Manome, Y   | 1996        | rat           | None               | 9L                  | Cytochrome<br>P450 2B1      | CPA            | Adenovirus                     | Intratumoural            | >0                        | Survival                 |
| Manome, Y   | 1996        | rat           | None               | 9L                  | Cytochrome<br>P450 2B1      | CPA            | Adenovirus                     | Intratumoural            | >0                        | Survival                 |
| Manome, Y   | 1996        | rat           | None               | 9L                  | Cytochrome<br>P450 2B1      | CPA            | Retrovirus-<br>producing cells | Intratumoural            | >0                        | Survival                 |
| Marconi, P  | 2000        | mouse         | Athymic            | U87                 | HSV-TK                      | GCV            | Adenovirus                     | Intratumoural            | >0                        | Unknown                  |
| Marconi, P  | 2000        | mouse         | Athymic            | U87                 | HSV-TK                      | GCV            | Adenovirus                     | Intratumoural            | >0                        | Unknown                  |

| <i>Name</i> | <i>Year</i> | <i>Animal</i> | <i>Comorbidity</i> | <i>Glioma Model</i> | <i>Gene therapy</i> | <i>Prodrug</i> | <i>Vector</i>          | <i>Route of delivery</i>  | <i>Delay to treatment</i> | <i>Survival endpoint</i> |
|-------------|-------------|---------------|--------------------|---------------------|---------------------|----------------|------------------------|---------------------------|---------------------------|--------------------------|
| Marconi, P  | 2000        | mouse         | Athymic            | U87                 | HSV-TK              | None           | Adenovirus             | Intratumoural             | >0                        | Unknown                  |
| Markert, J  | 2012        | Mouse         | None               | 4C8                 | IL-12               | None           | Adenovirus             | Intratumoural             | >0                        | Symptomatic              |
| Markert, J  | 2012        | Mouse         | None               | 4C8                 | IL-4                | None           | Adenovirus             | Intratumoural             | >0                        | Symptomatic              |
| Markert, J  | 2012        | Mouse         | SCID               | D54                 | IL-12               | None           | Adenovirus             | Intratumoural             | >0                        | Symptomatic              |
| Markert, J  | 2012        | Mouse         | SCID               | D54MG               | IL-12               | None           | Adenovirus             | Intratumoural             | >0                        | Symptomatic              |
| Markert, J  | 2012        | Mouse         | SCID               | D54MG               | IL-4                | None           | Adenovirus             | Intratumoural             | >0                        | Symptomatic              |
| Markert, J  | 2012        | Mouse         | SCID               | D54MG               | IL-4                | None           | Adenovirus             | Intratumoural             | >0                        | Symptomatic              |
| Maron, A    | 1996        | Rat           | None               | C6                  | HSV-TK              | GCV            | Adenovirus             | Intratumoural             | >0                        | Unknown                  |
| Matsuda, M  | 2009        | Mouse         | SCID               | U-118               | Eg5 siRNA           | None           | Retrovirus             | Intratumoural             | >0                        | Unknown                  |
| Matsuda, M  | 2011        | Mouse         | None               | RSV-M               | IL-2                | None           | Retrovirus             | Intratumoural             | >0                        | Survival                 |
| Matsuda, M  | 2011        | Mouse         | None               | RSV-M               | IL-2                | None           | Mesenchymal stem cell  | Intratumoural             | >0                        | Survival                 |
| Matsuda, M  | 2011        | Mouse         | None               | RSV-M               | IL-2                | None           | Retrovirus             | Intratumoural             | >0                        | Survival                 |
| Meijer, D   | 2009        | Mouse         | Athymic            | U87                 | IFN $\beta$         | None           | Adeno-associated virus | Intraperitonealsi lateral | >0                        | Symptomatic              |
| Meijer, D   | 2009        | Mouse         | Athymic            | U87                 | IFN $\beta$         | None           | Adeno-associated virus | Intraperitonealsi lateral | >0                        | Symptomatic              |
| Meijer, D   | 2009        | Mouse         | Athymic            | U87                 | IFN $\beta$         | None           | Adeno-associated virus | Intraperitonealsi lateral | <0                        | Symptomatic              |
| Mineta, T   | 1995        | Mouse         | Athymic            | U87                 | ICP6                | None           | Adenovirus             | Intratumoural             | >0                        | Unknown                  |
| Miura, F    | 2002        | Rat           | None               | 9L                  | HSV-TK              | GCV            | Adenovirus             | Intratumoural             | >0                        | Symptomatic              |

| <i>Name</i> | <i>Year</i> | <i>Animal</i> | <i>Comorbidity</i> | <i>Glioma Model</i> | <i>Gene therapy</i> | <i>Prodrug</i> | <i>Vector</i>                  | <i>Route of delivery</i> | <i>Delay to treatment</i> | <i>Survival endpoint</i> |
|-------------|-------------|---------------|--------------------|---------------------|---------------------|----------------|--------------------------------|--------------------------|---------------------------|--------------------------|
| Miura, F    | 2002        | Rat           | None               | 9L                  | HSV-TK              | GCV            | Adenovirus                     | Intratumoural            | >0                        | Symptomatic              |
| Mori, K     | 2010        | Rat           | None               | 9L                  | HSV-TK              | GCV            | BMesenchymal stem cell         | Coinoculation            | 0                         | Unknown                  |
| Mori, K     | 2010        | Rat           | None               | 9L                  | HSV-TK              | GCV            | Mesenchymal stem cell          | Coinoculation            | 0                         | Survival                 |
| Morioka, M  | 2002        | Mouse         | None               | RSV-M               | B7.1                | None           | Adenovirus                     | Coinoculation            | >0                        | Survival                 |
| Morioka, M  | 2002        | Mouse         | None               | RSV-M               | B7.1                | None           | Adenovirus                     | Coinoculation            | >0                        | Survival                 |
| Moriuchi, S | 1998        | mouse         | Athymic            | U87                 | TNF $\alpha$        | GCV            | Adenovirus                     | Intratumoural            | >0                        | Unknown                  |
| Moriuchi, S | 1998        | mouse         | Athymic            | U87                 | TNF $\alpha$        | GCV            | Adenovirus                     | Intratumoural            | >0                        | Unknown                  |
| Moriuchi, S | 2000        | Rat           | None               | 9L                  | ICP22 and ICP27     | None           | Adenovirus                     | Intratumoural            | >0                        | Symptomatic              |
| Moriuchi, S | 2000        | Rat           | None               | 9L                  | ICP4                | None           | Adenovirus                     | Intratumoural            | >0                        | Symptomatic              |
| Moriuchi, S | 2005        | Mouse         | Athymic            | U87                 | HSV-TK              | GCV            | Adenovirus                     | Intratumoural            | >0                        | Survival                 |
| Moriuchi, S | 2005        | Mouse         | Athymic            | U87                 | HSV-TK/IkBaM        | None           | Adenovirus                     | Intratumoural            | >0                        | Survival                 |
| Nafe, C     | 2003        | Rat           | None               | 9L                  | HSV-TK              | GCV            | Virus-producing cells          | Intratumoural            | >0                        | Unknown                  |
| Nam, M      | 1996        | Rat           | None               | 9L                  | IL-2                | None           | EndotheLipo/polyplexesal cells | Coinoculation            | 0                         | Survival                 |
| Namba, H    | 1998        | Rat           | None               | 9L                  | HSV-TK              | None           | Retrovirus                     | Intratumoural            | >0                        | Survival                 |
| Namba, H    | 1998        | Rat           | None               | 9L                  | HSV-TK              | None           | Retrovirus                     | Intratumoural            | >0                        | Survival                 |
| Natsume, A  | 1999        | Mouse         | None               | GL261               | IFN $\beta$         | None           | Lipo/polyplexes                | Intratumoural            | >0                        | Survival                 |
| Nestler, U  | 2004        | Mouse         | Athymic            | U87                 | HSV-TK              | None           | Adenovirus                     | Intratumoural            | >0                        | Unknown                  |

| <i>Name</i>    | <i>Year</i> | <i>Animal</i> | <i>Comorbidity</i> | <i>Glioma Model</i> | <i>Gene therapy</i>  | <i>Prodrug</i> | <i>Vector</i>   | <i>Route of delivery</i> | <i>Delay to treatment</i> | <i>Survival endpoint</i> |
|----------------|-------------|---------------|--------------------|---------------------|----------------------|----------------|-----------------|--------------------------|---------------------------|--------------------------|
| Niranjan, A    | 2000        | Mouse         | Athymic            | U87                 | HSV-TK               | None           | Adenovirus      | Intratumoural            | >0                        | Symptomatic              |
| Niranjan, A    | 2000        | mouse         | Athymic            | U87                 | TNF $\alpha$         | None           | Adenovirus      | Intratumoural            | >0                        | Symptomatic              |
| Ogren, S       | 2009        | Rat           | Athymic            | U87                 | DTEGF13              | None           | Plasmids        | Intratumoural            | >0                        | Unknown                  |
| Ohlfest, J     | 2005        | Mouse         | None               | U87                 | sFlt-1 and statin-AE | None           | Plasmids        | Intratumoural            | >0                        | Survival                 |
| Ohlfest, J     | 2005        | Mouse         | None               | U87                 | sFlt-1 and statin-AE | None           | Plasmids        | Intratumoural            | >0                        | Survival                 |
| Okada, T       | 2001        | Rat           | None               | 9L                  | HSV-TK               | GCV            | Adenovirus      | Subcutaneous             | >0                        | Unknown                  |
| Otsuki, A      | 2008        | Mouse         | None               | U87                 | Nestin               | None           | Adenovirus      | Intratumoural            | >0                        | Unknown                  |
| Otsuki, A      | 2008        | Mouse         | None               | U87                 | Nestin               | Valproic acid  | Adenovirus      | Intratumoural            | >0                        | Unknown                  |
| Paraskevaki, G | 2007        | Mouse         | None               | GBM12               | EGFR                 | None           | Retrovirus      | Intratumoural            | >0                        | Survival                 |
| Paraskevaki, G | 2007        | Mouse         | None               | GBM12               | virus only           | None           | Retrovirus      | Intratumoural            | >0                        | Survival                 |
| Paul, D        | 2000        | Rat           | None               | F98                 | B7.1                 | None           | Plasmids        | Subcutaneous             | <0                        | Symptomatic + 1 day      |
| Paul, S        | 2000        | Rat           | None               | F98                 | B7.1                 | None           | Plasmids        | Subcutaneous             | <0                        | Symptomatic + 1 day      |
| Pellegatta, S  | 2006        | Mouse         | None               | GL261-AC            | GL261-AC             | None           | Dendritic cells | Subcutaneous             | >0                        | Survival                 |
| Pellegatta, S  | 2006        | Mouse         | None               | GL261-NS            | GL261-AC             | None           | Dendritic cells | Subcutaneous             | >0                        | Survival                 |
| Pellegatta, S  | 2006        | Mouse         | None               | GL261-AC            | GL261-NS             | None           | Dendritic cells | Subcutaneous             | >0                        | Survival                 |
| Pellegatta, S  | 2006        | Mouse         | None               | GL261-NS            | GL261-NS             | None           | Dendritic cells | Subcutaneous             | >0                        | Survival                 |
| Peres, E       | 2011        | Rat           | None               | 9L                  | EPO                  | None           | Plasmids        | Pretransfected           | 0                         | Unknown                  |
| Peres, E       | 2011        | Rat           | None               | 9L                  | EPO                  | None           | Plasmids        | Pretransfected           | 0                         | Unknown                  |
| Peres, E       | 2011        | Mouse         | None               | U87                 | EPO                  | None           | Plasmids        | Pretransfected           | 0                         | Unknown                  |

| <i>Name</i>  | <i>Year</i> | <i>Animal</i> | <i>Comorbidity</i> | <i>Glioma Model</i> | <i>Gene therapy</i> | <i>Prodrug</i> | <i>Vector</i>         | <i>Route of delivery</i> | <i>Delay to treatment</i> | <i>Survival endpoint</i> |
|--------------|-------------|---------------|--------------------|---------------------|---------------------|----------------|-----------------------|--------------------------|---------------------------|--------------------------|
| Peres, E     | 2011        | Mouse         | None               | U87                 | EPO-R               | None           | Plasmids              | Pretransfected           | 0                         | Unknown                  |
| Perri, S     | 2005        | Mouse         | None               | U87                 | U87-hk5His-GFP      | None           | Retrovirus            | Pretransfected           | 0                         | Survival                 |
| Persson, B   | 2010        | Rat           | None               | N29                 | IFN $\gamma$        | None           | Retrovirus            | Intraperitoneal          | >0                        | Symptomatic              |
| Persson, B   | 2010        | Rat           | None               | N32                 | IFN $\gamma$        | None           | Retrovirus            | Intraperitoneal          | >0                        | Symptomatic              |
| Phuong, L    | 2003        | Mouse         | Athymic            | U87                 | CEA Mv              | None           | Retrovirus            | Intratumoural            | >0                        | Symptomatic              |
| Redaelli, M  | 2012        | Rat           | None               | F98                 | HSV-TK              | GCV            | Adenovirus            | Intravenous              | >0                        | Survival                 |
| Redaelli, M  | 2012        | Mouse         | None               | GL261               | HSV-TK              | GCV            | Adenovirus            | Intravenous              | >0                        | Survival                 |
| Roche, F     | 2010        | Rat           | None               | RG2                 | IL-12 and VLP       | None           | Retrovirus            | Intratumoural            | >0                        | Symptomatic              |
| Ross, J      | 1995        | Rat           | None               | 9L                  | HSV-TK              | GCV            | Adenovirus            | Intracerebral            | >0                        | Unknown                  |
| Ryu, C       | 2011        | Mouse         | None               | GL26                | IL-12               | None           | Mesenchymal stem cell | Intratumoural            | >0                        | Unknown                  |
| Saka, M      | 2010        | Mouse         | None               | KR158B              | IL-13ra2            | None           | Dendritic cells       | Intraperitoneal          | >0                        | Unknown                  |
| Samoto, K    | 2002        | Mouse         | Athymic            | U87                 | HSV-TK              | None           | Adenovirus            | Intratumoural            | >0                        | Unknown                  |
| Sandmair, A  | 2000        | Rat           | None               | BT4C                | HSV-TK              | GCV            | Retrovirus            | Pretransfected           | 0                         | Survival                 |
| Santra, M    | 2010        | Rat           | Athymic            | U87                 | DCX                 | None           | Retrovirus            | Intratumoural            | >0                        | Survival                 |
| Sato, H      | 2005        | Mouse         | None               | GL261               | IFN $\alpha$        | None           | Mesenchymal stem cell | Intratumoural            | >0                        | Survival                 |
| Schneider, T | 2008        | Rat           | None               | F98                 | TGF- $\beta$        | None           | Oligopeptides         | Subcutaneous             | 0                         | Survival                 |
| Shah, A      | 2006        | Mouse         | SCID               | D54                 | IL-12               | None           | Adenovirus            | Intratumoural            | >0                        | Survival                 |
| Shah, A      | 2006        | Mouse         | SCID               | D54                 | IL-12               | None           | Adenovirus            | Intratumoural            | >0                        | Survival                 |

| <i>Name</i> | <i>Year</i> | <i>Animal</i> | <i>Comorbidity</i> | <i>Glioma Model</i> | <i>Gene therapy</i>    | <i>Prodrug</i> | <i>Vector</i>   | <i>Route of delivery</i> | <i>Delay to treatment</i> | <i>Survival endpoint</i> |
|-------------|-------------|---------------|--------------------|---------------------|------------------------|----------------|-----------------|--------------------------|---------------------------|--------------------------|
| Shah, A     | 2006        | Mouse         | SCID               | D54MG               | IL-12                  | None           | Adenovirus      | Intratumoural            | >0                        | Survival                 |
| Shah, A     | 2007        | Mouse         | SCID               | U87                 | HSV-34.5gamma and IRS1 | None           | Adenovirus      | Intratumoural            | >0                        | Symptomatic              |
| Shah, A     | 2007        | Mouse         | SCID               | U87                 | HSV-34.5gamma and IRS1 | None           | Adenovirus      | Intratumoural            | >0                        | Symptomatic              |
| Shah, A     | 2007        | Mouse         | SCID               | U87                 | HSV-34.5gamma and TRS1 | None           | Adenovirus      | Intratumoural            | >0                        | Symptomatic              |
| Shah, A     | 2007        | Mouse         | SCID               | U87                 | HSV-34.5gamma and TRS1 | None           | Adenovirus      | Intratumoural            | >0                        | Symptomatic              |
| Shir, A     | 2006        | Mouse         | Athymic            | U87                 | Poly IC                | None           | Lipo/polyplexes | Intratumoural            | >0                        | Unknown                  |
| Sonabend, A | 2008        | Mouse         | None               | GL261               | IL-12                  | BCNU           | Lipo/polyplexes | Intratumoural            | >0                        | Survival                 |
| Sonabend, A | 2008        | Mouse         | None               | GL261               | IL-12                  | None           | Lipo/polyplexes | Intratumoural            | >0                        | Survival                 |
| Sonabend, A | 2008        | Mouse         | None               | GL261               | IL-12                  | None           | Lipo/polyplexes | Intratumoural            | >0                        | Survival                 |
| Sun, X      | 2012        | Mouse         | None               | U87                 | TRAIL                  | None           | Lipo/polyplexes | Intravenous              | >0                        | Survival                 |
| Sun, X      | 2012        | Mouse         | None               | U87                 | TRAIL                  | None           | Lipo/polyplexes | Intravenous              | >0                        | Survival                 |
| Sun, X      | 2012        | Mouse         | None               | U87                 | TRAIL                  | Paclitaxel     | Lipo/polyplexes | Intravenous              | >0                        | Survival                 |
| Sun, X      | 2012        | Mouse         | None               | U87                 | TRAIL                  | Paclitaxel     | Lipo/polyplexes | Intravenous              | >0                        | Survival                 |
| Szatmari, T | 2008        | Mouse         | None               | C6                  | dCK                    | Gemcitabine    | Adenovirus      | Pretransfected           | 0                         | Symptomatic              |
| Szatmari, T | 2008        | Rat           | None               | C6                  | dCK                    | None           | Adenovirus      | Pretransfected           | 0                         | Symptomatic              |
| Szatmari, T | 2008        | Mouse         | None               | GL261               | dCK                    | Gemcitabine    | Adenovirus      | Pretransfected           | 0                         | Symptomatic              |

| <i>Name</i>  | <i>Year</i> | <i>Animal</i> | <i>Comorbidity</i> | <i>Glioma Model</i> | <i>Gene therapy</i> | <i>Prodrug</i> | <i>Vector</i> | <i>Route of delivery</i> | <i>Delay to treatment</i> | <i>Survival endpoint</i> |
|--------------|-------------|---------------|--------------------|---------------------|---------------------|----------------|---------------|--------------------------|---------------------------|--------------------------|
| Szatmari, T  | 2008        | Mouse         | None               | GL261               | dCK                 | None           | Adenovirus    | Pretransfected           | 0                         | Symptomatic              |
| Tabatabai, G | 2010        | Mouse         | None               | LNT-229             | HPC                 | None           | Retrovirus    | Intravenous              | >0                        | Symptomatic              |
| Tabatabai, G | 2010        | Mouse         | None               | SMA-560             | HPC                 | None           | Retrovirus    | Intravenous              | >0                        | Symptomatic              |
| Tamura, K    | 2001        | Mouse         | None               | RSV-M               | HSV-TK              | GCV            | Retrovirus    | Intratumoural            | >0                        | Survival                 |
| Tse, V       | 2004        | Rat           | None               | Rt-2                | p53                 | None           | Retrovirus    | Pretransfected           | 0                         | Symptomatic              |
| Tseng, S     | 1997        | Rat           | None               | C6                  | GM-CSF              | None           | Retrovirus    | Intraperitoneal          | 0                         | Survival                 |
| Tseng, S     | 1997        | Rat           | None               | C6                  | IL-2                | None           | Retrovirus    | Intraperitoneal          | 0                         | Survival                 |
| Tseng, S     | 1997        | Rat           | None               | C6                  | IL-4                | None           | Retrovirus    | Intraperitoneal          | 0                         | Survival                 |
| Tsugawa, T   | 2004        | Mouse         | None               | GL261               | IFN $\alpha$        | None           | Adenovirus    | Intratumoural            | >0                        | Symptomatic              |
| Ueda, R      | 2008        | Mouse         | None               | GL261               | SOX6                | None           | Plasmids      | Intraperitoneal          | >0                        | Survival                 |
| Ueda, R      | 2008        | Mouse         | None               | GL261               | SOX6                | None           | Plasmids      | Intraperitoneal          | >0                        | Survival                 |
| Ulasov, I    | 2007        | Mouse         | None               | GL261               | E1A                 | None           | Adenovirus    | Intratumoural            | >0                        | Survival                 |
| Ulasov, I    | 2007        | Mouse         | None               | GL261               | E1A                 | None           | Adenovirus    | Intratumoural            | >0                        | Survival                 |
| Ulasov, I    | 2007        | Mouse         | Athymic            | U87                 | E1A                 | None           | Adenovirus    | Intratumoural            | >0                        | Unknown                  |
| Verheije, M  | 2009        | Mouse         | Athymic            | U87                 | EGFR                | None           | Retrovirus    | Intratumoural            | >0                        | Symptomatic              |
| Viita, H     | 2012        | Rat           | None               | BT4C                | 15-lipoxygenase-1   | None           | Adenovirus    | Intraperitonealsilateral | >0                        | Symptomatic              |
| Vincent, A   | 1996        | Rat           | None               | 9L                  | HSV-TK and IL-2     | GCV            | Adenovirus    | Intratumoural            | >0                        | Unknown                  |

| <i>Name</i> | <i>Year</i> | <i>Animal</i> | <i>Comorbidity</i> | <i>Glioma Model</i> | <i>Gene therapy</i> | <i>Prodrug</i> | <i>Vector</i>              | <i>Route of delivery</i> | <i>Delay to treatment</i> | <i>Survival endpoint</i> |
|-------------|-------------|---------------|--------------------|---------------------|---------------------|----------------|----------------------------|--------------------------|---------------------------|--------------------------|
| Vincent, A  | 1996        | Rat           | None               | 9L                  | HSV-TK and IL-2     | GCV            | Adenovirus                 | Intratumoural            | >0                        | Unknown                  |
| Vincent, A  | 1996        | Rat           | None               | 9L                  | HSV-TK and IL-2     | GCV            | Adenovirus                 | Intratumoural            | >0                        | Unknown                  |
| Vincent, A  | 1996        | Rat           | None               | 9L                  | HSV-TK and IL-2     | GCV            | Retrovirus-producing cells | Intratumoural            | >0                        | Unknown                  |
| Vincent, A  | 1996        | Rat           | None               | 9L                  | HSV-TK and IL-2     | GCV            | Adenovirus                 | Intratumoural            | >0                        | Unknown                  |
| Vincent, A  | 1996        | Rat           | None               | 9L                  | HSV-TK and IL-2     | None           | Retrovirus-producing cells | Intratumoural            | >0                        | Unknown                  |
| Vincent, A  | 1997        | Rat           | None               | 9L                  | HSV-TK              | GCV            | Adenovirus                 | Intratumoural            | >0                        | Symptomatic              |
| Vincent, A  | 1997        | Rat           | None               | 9L                  | HSV-TK              | GCV            | Adenovirus                 | Intratumoural            | >0                        | Symptomatic              |
| Vincent, A  | 1997        | Rat           | None               | 9L                  | HSV-TK              | GCV            | Adenovirus                 | Intratumoural            | >0                        | Symptomatic              |
| Vincent, A  | 1997        | Rat           | None               | 9L                  | HSV-TK              | GCV            | Adenovirus                 | Intratumoural            | >0                        | Symptomatic              |
| Vincent, A  | 1997        | Rat           | None               | 9L                  | HSV-TK              | GCV            | Adenovirus                 | Intratumoural            | >0                        | Symptomatic              |
| Vincent, A  | 1997        | Rat           | None               | 9L                  | HSV-TK              | GCV            | Adenovirus                 | Intratumoural            | >0                        | Symptomatic              |
| Visse, E    | 1999        | Rat           | None               | N32                 | B7.1                | None           | Retrovirus                 | Subcutaneous             | >0                        | Symptomatic              |
| Visse, E    | 1999        | Rat           | None               | N32                 | B7.1                | None           | Retrovirus                 | Subcutaneous             | >0                        | Symptomatic              |
| Visse, E    | 1999        | Rat           | None               | N32                 | IFN $\gamma$        | None           | Retrovirus                 | Subcutaneous             | >0                        | Symptomatic              |
| Visse, E    | 1999        | Rat           | None               | N32                 | IFN $\gamma$        | None           | Retrovirus                 | Subcutaneous             | >0                        | Symptomatic              |
| Visse, E    | 1999        | Rat           | None               | N32                 | IL-7                | None           | Retrovirus                 | Subcutaneous             | >0                        | Symptomatic              |

| <i>Name</i> | <i>Year</i> | <i>Animal</i> | <i>Comorbidity</i> | <i>Glioma Model</i> | <i>Gene therapy</i> | <i>Prodrug</i> | <i>Vector</i> | <i>Route of delivery</i> | <i>Delay to treatment</i> | <i>Survival endpoint</i> |
|-------------|-------------|---------------|--------------------|---------------------|---------------------|----------------|---------------|--------------------------|---------------------------|--------------------------|
| Visse, E    | 1999        | Rat           | None               | N32                 | IL-7                | None           | Retrovirus    | Subcutaneous             | >0                        | Symptomatic              |
| Wang, R     | 1999        | Rat           | None               | C6                  | CD and HSV-TK       | None           | Adenovirus    | Intratumoural            | >0                        | Survival                 |
| Wang, S     | 2001        | Rat           | None               | Rt-2                | p21                 | None           | Retrovirus    | Intraperitonealsilateral | >0                        | Survival                 |
| Wang, S     | 2001        | Rat           | None               | Rt-2                | p53                 | None           | Retrovirus    | Intraperitonealsilateral | >0                        | Survival                 |
| Wang, T     | 2001        | Rat           | None               | Rt-2                | p16                 | None           | Retrovirus    | Intraperitonealsilateral | >0                        | Survival                 |
| Wang, Y     | 2011        | Mouse         | None               | U87                 | siRNA survivin      | None           | Plasmids      | Intravenous              | >0                        | Survival                 |
| Wei, M      | 1995        | Mouse         | Athymic            | C6                  | IL-4                | None           | Retrovirus    | Intratumoural            | >0                        | Unknown                  |
| Wirth, T    | 2012        | Rat           | None               | BT4C                | Avidin              | Yttrium        | Retrovirus    | Intravenous              | >0                        | Survival                 |
| Wirth, T    | 2012        | Rat           | None               | BT4C                | Avidin              | Yttrium        | Retrovirus    | Intravenous              | >0                        | Survival                 |
| Wu, A       | 2007        | Mouse         | None               | GL261               | IFN $\gamma$        | None           | Plasmids      | Intratumoural            | >0                        | Survival                 |
| Wu, D       | 2007        | Mouse         | None               | GL261               | IFN $\gamma$ + SB   | None           | Plasmids      | Intratumoural            | >0                        | Survival                 |
| Wu, D       | 2007        | Mouse         | None               | GL261               | IFN $\gamma$ + SB   | None           | Plasmids      | Intratumoural            | >0                        | Survival                 |
| Xu, D       | 2006        | Rat           | None               | C6                  | p53                 | None           | Adenovirus    | Intracerebral            | >0                        | Survival                 |
| Yacoub, A   | 2003        | Rat           | None               | Rt-2                | IL-24               | None           | Adenovirus    | Pretransfected           | 0                         | Survival                 |
| Yacoub, A   | 2008        | Mouse         | Athymic            | GBM12               | mda-7               | None           | Adenovirus    | Intratumoural            | >0                        | Symptomatic              |
| Yacoub, A   | 2008        | Mouse         | Athymic            | GBM6                | mda-7               | None           | Adenovirus    | Intratumoural            | >0                        | Symptomatic              |
| Yamanaka, R | 1995        | Mouse         | Athymic            | NP-1                | IL-8                | None           | Retrovirus    | Pretransfected           | 0                         | Unknown                  |
| Yamanaka, R | 1995        | Mouse         | Athymic            | NP-1                | IL-8                | None           | Retrovirus    | Pretransfected           | 0                         | Unknown                  |
| Yamanaka, R | 1995        | Mouse         | Athymic            | NP-1                | IL-8                | None           | Retrovirus    | Pretransfected           | 0                         | Unknown                  |
| Yamanaka, R | 1999        | Mouse         | Athymic            | Onda 10             | TGF- $\beta$ 1      | None           | Retrovirus    | Intracerebral            | 0                         | Unknown                  |
| Yamanaka, R | 1999        | Mouse         | Athymic            | Onda 10             | TGF- $\beta$ 1      | None           | Retrovirus    | Intracerebral            | 0                         | Unknown                  |

| <i>Name</i> | <i>Year</i> | <i>Animal</i> | <i>Comorbidity</i> | <i>Glioma Model</i> | <i>Gene therapy</i>        | <i>Prodrug</i> | <i>Vector</i>   | <i>Route of delivery</i> | <i>Delay to treatment</i> | <i>Survival endpoint</i> |
|-------------|-------------|---------------|--------------------|---------------------|----------------------------|----------------|-----------------|--------------------------|---------------------------|--------------------------|
| Yamanaka, R | 1999        | Mouse         | Athymic            | Onda 10             | TGF-β1                     | None           | Retrovirus      | Intracerebral            | 0                         | Unknown                  |
| Yamanaka, R | 2000        | Mouse         | None               | G203                | IL-12                      | None           | Retrovirus      | Pretransfected           | >0                        | Survival                 |
| Yamanaka, R | 2001        | Mouse         | None               | B16                 | SFV-mediated B16 cDNA      | None           | Dendritic cells | Intraperitoneal          | <0                        | Survival                 |
| Yamanaka, R | 2001        | Mouse         | None               | B16                 | SFV-mediated G203 cDNA     | None           | Dendritic cells | Intraperitoneal          | <0                        | Survival                 |
| Yamanaka, R | 2001        | Mouse         | None               | G203                | SFV-mediated B16 cDNA      | None           | Dendritic cells | Intraperitoneal          | <0                        | Survival                 |
| Yamanaka, R | 2001        | Mouse         | None               | G203                | SFV-mediated G203 cDNA     | None           | Dendritic cells | Intraperitoneal          | <0                        | Survival                 |
| Yamanaka, R | 2002        | Mouse         | None               | G203                | IL-12 and IL-18            | None           | Dendritic cells | Intraperitoneal          | >0                        | Unknown                  |
| Yamanaka, R | 2002        | Mouse         | None               | G203                | IL-12 and IL-18            | None           | Dendritic cells | Intraperitoneal          | >0                        | Unknown                  |
| Yamini, B   | 2004        | Mouse         | Athymic            | U87                 | TNFα                       | None           | Adenovirus      | Intratumoural            | >0                        | Symptomatic              |
| Yamini, B   | 2004        | Mouse         | Athymic            | U87                 | TNFα                       | TMZ            | Adenovirus      | Intratumoural            | >0                        | Symptomatic              |
| Yang, Y     | 2011        | Mouse         | SCID               | GBM                 | sh-STAT3                   | None           | Retrovirus      | Unknown                  | >0                        | Unknown                  |
| Yokoyama, T | 2008        | Mouse         | Athymic            | U87                 | RGD                        | None           | Adenovirus      | Intratumoural            | >0                        | Symptomatic              |
| Yokoyama, T | 2008        | Mouse         | Athymic            | U87                 | RGD                        | RAD001         | Adenovirus      | Intratumoural            | >0                        | Symptomatic              |
| Yokoyama, T | 2008        | Mouse         | Athymic            | U87                 | RGD                        | TMZ            | Adenovirus      | Intratumoural            | >0                        | Symptomatic              |
| Yoo, J      | 2012        | Mouse         | None               | Gli36delta5         | HSV-34.5gamma and Vstat120 | None           | Adenovirus      | Intratumoural            | >0                        | Symptomatic              |
| Yoo, J      | 2012        | Mouse         | None               | Gli36delta5         | HSV-Vstat120               | None           | Adenovirus      | Intratumoural            | >0                        | Symptomatic              |

| <i>Name</i>  | <i>Year</i> | <i>Animal</i> | <i>Comorbidity</i> | <i>Glioma Model</i> | <i>Gene therapy</i>        | <i>Prodrug</i> | <i>Vector</i>          | <i>Route of delivery</i> | <i>Delay to treatment</i> | <i>Survival endpoint</i> |
|--------------|-------------|---------------|--------------------|---------------------|----------------------------|----------------|------------------------|--------------------------|---------------------------|--------------------------|
| Yoo, J       | 2012        | Mouse         | None               | U87                 | HSV-34.5gamma and Vstat120 | None           | Adenovirus             | Intratumoural            | >0                        | Symptomatic              |
| Yoo, J       | 2012        | Mouse         | None               | U87                 | HSV-gamma34.5              | None           | Adenovirus             | Intratumoural            | >0                        | Symptomatic              |
| Yoo, J       | 2012        | Mouse         | None               | U87                 | HSV-Vstat120               | None           | Adenovirus             | Intratumoural            | >0                        | Symptomatic              |
| Yoo, J       | 2012        | Mouse         | None               | X12-V2              | HSV-34.5gamma and Vstat120 | None           | Adenovirus             | Intratumoural            | >0                        | Symptomatic              |
| Yoo, J       | 2012        | Mouse         | None               | X12-V2              | HSV-Vstat120               | None           | Adenovirus             | Intratumoural            | >0                        | Symptomatic              |
| Yoshida, J   | 2002        | Mouse         | Athymic            | U251                | IFN $\beta$                | None           | Adeno-associated virus | Intratumoural            | 0                         | Survival                 |
| Yoshida, J   | 2002        | Mouse         | Athymic            | U251                | IFN $\beta$                | None           | Adeno-associated virus | Intratumoural            | 0                         | Survival                 |
| Yoshikawa, K | 2000        | Mouse         | None               | RSV-MG              | IL-4                       | None           | Adenovirus             | Pretransfected           | >0                        | Unknown                  |
| Yoshikawa, K | 2000        | Mouse         | None               | RSV-MG              | IL-4                       | None           | Adenovirus             | Pretransfected           | 0                         | Unknown                  |
| Yu, J        | 1997        | Mouse         | None               | GL261               | GM-CSF                     | None           | Retrovirus             | Subcutaneous             | >0                        | Survival                 |
| Yu, J        | 1997        | Mouse         | None               | GL261               | GM-CSF                     | None           | Retrovirus             | Subcutaneous             | >0                        | Survival                 |
| Yu, J        | 1997        | Mouse         | None               | GL261               | GM-CSF                     | None           | Retrovirus             | Subcutaneous             | <0                        | Survival                 |
| Yu, J        | 1997        | Mouse         | None               | GL261               | GM-CSF                     | None           | Retrovirus             | Subcutaneous             | >0                        | Survival                 |
| Yu, J        | 1997        | Mouse         | None               | GL261               | GM-CSF                     | None           | Retrovirus             | Subcutaneous             | <0                        | Survival                 |

| <i>Name</i> | <i>Year</i> | <i>Animal</i> | <i>Comorbidity</i> | <i>Glioma Model</i> | <i>Gene therapy</i> | <i>Prodrug</i> | <i>Vector</i> | <i>Route of delivery</i> | <i>Delay to treatment</i> | <i>Survival endpoint</i> |
|-------------|-------------|---------------|--------------------|---------------------|---------------------|----------------|---------------|--------------------------|---------------------------|--------------------------|
| Zang, H     | 2007        | Rat           | None               | C6                  | M protein           | None           | Plasmids      | Intravenous              | >0                        | Survival                 |
| Zhang, W    | 2011        | Mouse         | Athymic            | U87                 | Angiostatin         | None           | Adenovirus    | Intratumoural            | >0                        | Symptomatic              |
| Zhang, W    | 2011        | Mouse         | Athymic            | U87                 | Angiostatin         | None           | Adenovirus    | Intratumoural            | >0                        | Symptomatic              |
| Zhang, X    | 2004        | Rat           | None               | C6                  | IL-18+Fas           | None           | Retrovirus    | Pretransfected           | 0                         | Survival                 |
| Zhang, Y    | 2002        | Mouse         | SCID               | U87                 | EGFR AS             | None           | Plasmids      | Intravenous              | >0                        | Survival                 |
| Zhang, Y    | 2004        | Rat           | None               | C6                  | IL-18               | None           | Retrovirus    | Pretransfected           | 0                         | Survival                 |
| Zhang, Y    | 2004        | Mouse         | SCID               | U87                 | EGFR                | None           | Plasmids      | Intravenous              | >0                        | Survival                 |
| Zhang, Z    | 2004        | Mouse         | Athymic            | U87                 | GALV.fus            | None           | Plasmids      | Intratumoural            | >0                        | Symptomatic              |
| Zhu, F      | 2011        | Mouse         | Athymic            | U87                 | sGC-a1b1cys105      | None           | Retrovirus    | Pretransfected           | 0                         | Symptomatic              |
| Zhu, H      | 2011        | Mouse         | Athymic            | U87                 | sGC                 | None           | Retrovirus    | Pretransfected           | 0                         | Symptomatic              |
